# Supplementary material for: Overexpression of an ART1-Interacting Gene OsNAC016 Improves Al Tolerance in Rice
Source: MDPI journal article supplement (doi:10.3390/ijms242317036), 2023-12-01
Supplement: s1 [file s1]

## Supplemental Figure.

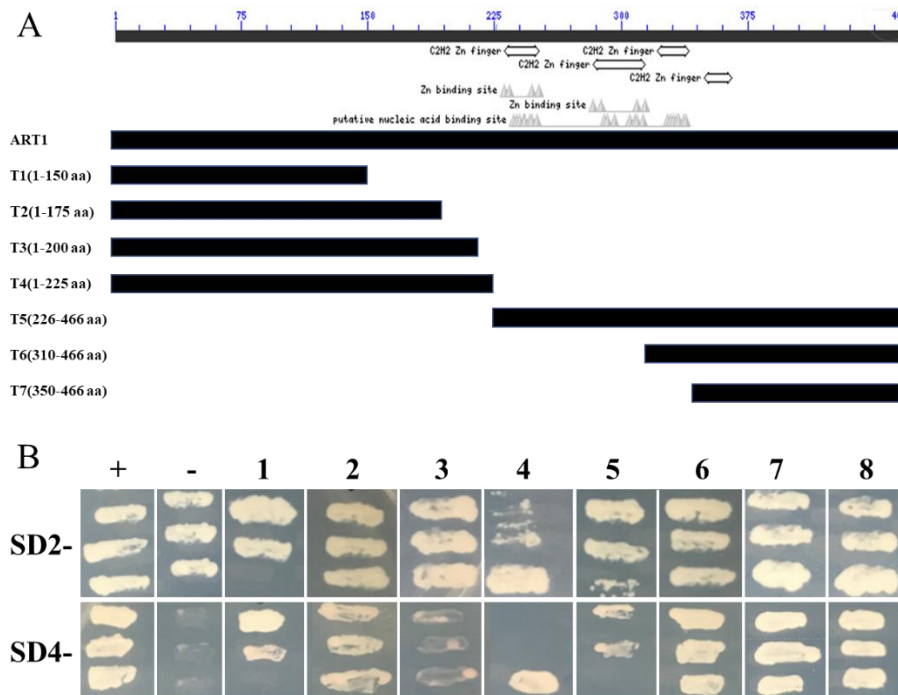

**Figure S1. Transcriptional activation analysis of various truncated ART1s.** (A) ART1 was truncated into different fragments, including T1 (1-150 aa), T2 (1-175 aa), T3 (1-200 aa), T4 (1-225 aa), T5 (226-466 aa), T6 (310-466 aa) and T7 (350-466 aa). (B) Identification of self-activation domain of ART. + : AD-T7 + BK-53, - : AD + BK, 1: ART1-BK + AD, 2: ART1-T1-BK + AD, 3: ART1-T2-BK + AD, 4: ART1-T3-BK + AD, 5: ART1-T4-BK + AD, 6: ART1-T5-BK + AD, 7: ART1-T6-BK + AD, 8: ART1-T7-BK + AD, the above pair of plasmids were co-transformed into yeast cells(AH109). The yeast colonies were grown on SD2- and SD4- medium plate. The plates were incubated at 30 °C for 3 d.

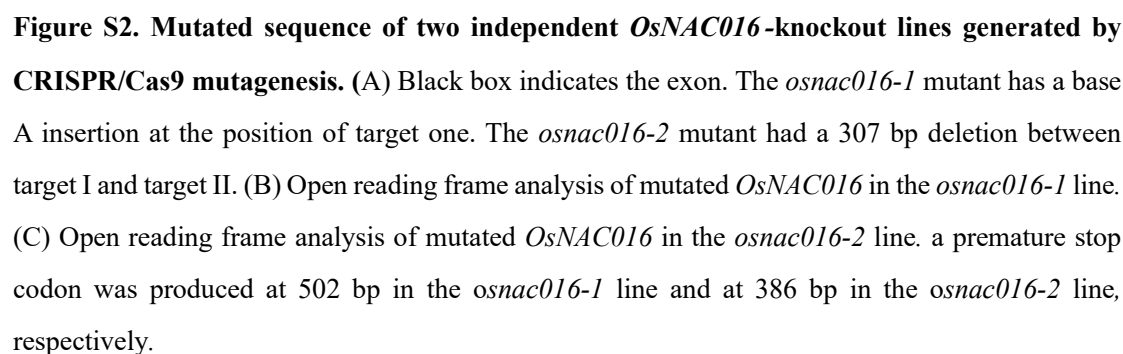

**Figure S2. Mutated sequence of two independent *OsNAC016*-knockout lines generated by CRISPR/Cas9 mutagenesis.** (A) Black box indicates the exon. The *osnac016-1* mutant has a base A insertion at the position of target one. The *osnac016-2* mutant had a 307 bp deletion between target I and target II. (B) Open reading frame analysis of mutated *OsNAC016* in the *osnac016-1* line. (C) Open reading frame analysis of mutated *OsNAC016* in the *osnac016-2* line. a premature stop codon was produced at 502 bp in the *osnac016-1* line and at 386 bp in the *osnac016-2* line, respectively.

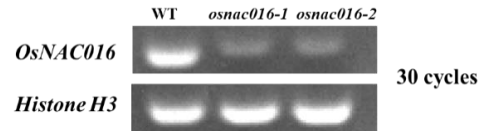

**Figure S3. Transcript level of *OsNAC016* in roots of the wild-type and *osnac016* plants.** The expression level of *OsNAC016* in the roots of 5-d-old rice seedlings were determined by semi-quantitative RT-PCR. *Histone H3* was used as an internal standard.

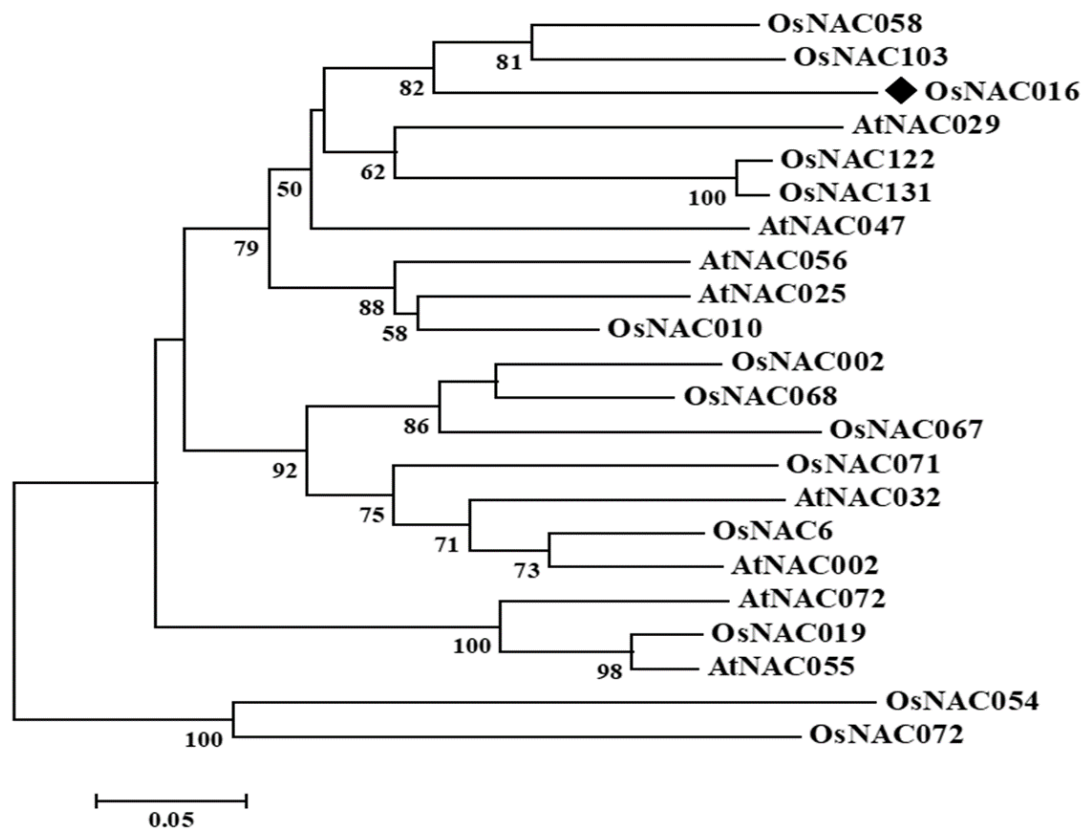

**Figure S4. Phylogenetic tree analysis of *OsNAC016*.** Homologs sharing with more than 40% identity to *OsNAC016* were used to construct the phylogenetic tree. Multiple sequence alignment was performed using the MEGA 6.0 and the phylogenetic tree was created.

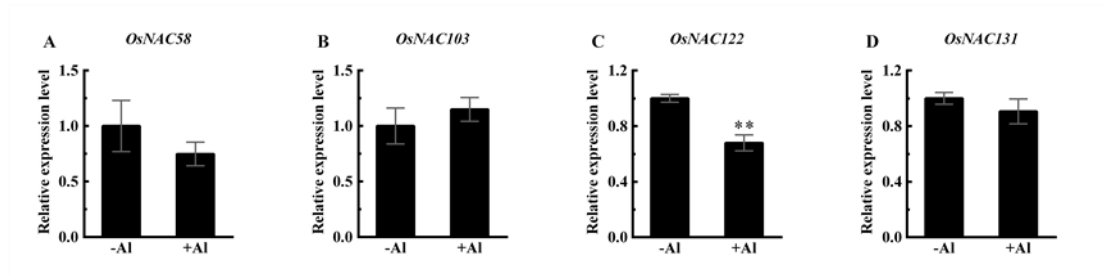

**Figure S5. Expression analysis of four OsNAC016 homologous genes in roots.** (A-D) Rice seedlings (5-d-old) were subjected to a solution containing 0 or 30  $\mu$ M  $\text{AlCl}_3$  for 8 h. Histone H3 was used as an internal standard. Data are means  $\pm$  SD ( $n = 3$ ). Asterisks indicates significant differences ( $P < 0.01$ , Tukey's test).

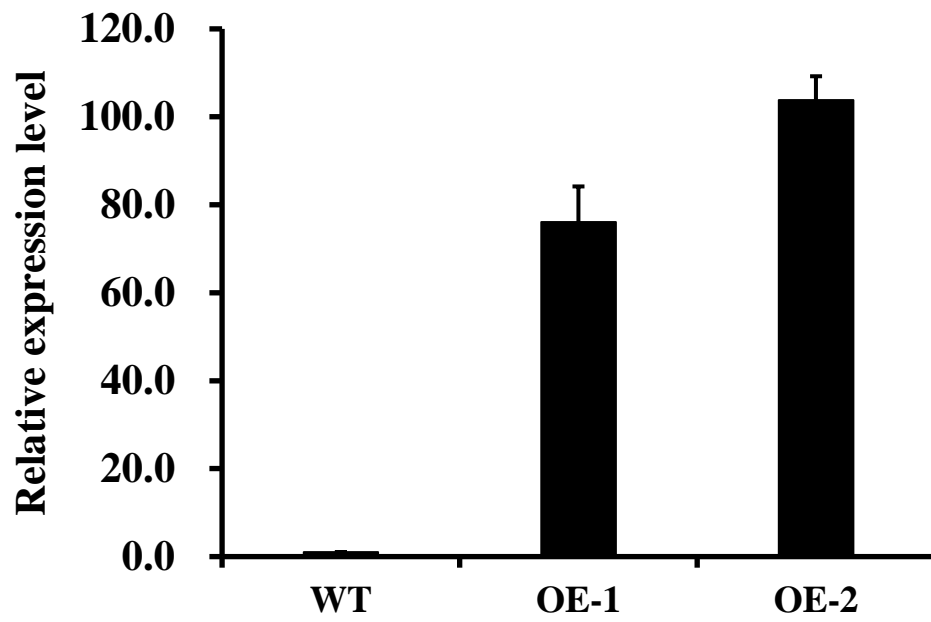

**Figure S6. Relative expression levels of *OsNAC016* in the *OsNAC016*-overexpression lines (OE-1, OE-2) in roots.** Data are means  $\pm$  SD of three biological replicates.

ATCTAATCATTAATTGTCAAAAAGACATTGAGCACATCATCCTCCCTCGTTGCTGCACATACAATT  
 GAGATATTTTATTTTCTTCAACTCTAAACTACAATTTTCTCATTTTCCGTTAGCACACTATACAAA  
 TTGTTAAATAGTATTATGTTTTTTTTTCAAAAAGTGTATATATAAAATTTCTTTAAATAAATTTA  
 TCTTTAAAGTTTATTATAAATTAATTATATGCTAATGTCTTATCTCACTTTATGTGTGCTTGAAAAG  
 CTAACCAAATTGTGCTGATTTGAATTAAGCCCGAGTCACTCGCATATGAGTAGTCCTATTTGTT  
 ACGGTCTCACATGCGAATGATTTAGCTTCCTTATACTATACTCTTTTCGTAACAAAATATAATAA  
 CCTACTACTGGAACATAAAACCTGTTTAGATTCTTAATACTTGACGGAGCGTGGGGCTCCTCAC  
 CGGGAGACCGCGCGGGCCCTTTGCCGGTTCGGCCGGGGCGCTAAGTGAGGTTCTAAGCC  
 CTTGATCTGTGGAATGGTTTCGCGAGAGAGTAAATGCACAAGA CACG GCGG ATGTAGACAGGTT  
 C GGGCCG CTGAGAAGCGTAATACCCTACTCCTGTGTTCTGGTGGATCTGTGTATGAAGGAGTTA  
 CAAAGAGCTGGAGAGCAAGAGAGTTTCGAACTCTAGAGACCCTCTCCCTACTCTTTTTCCCAGTC  
 CCCTCTTTTTCTTTTCCCCCGTCCGTCAGTCCGTCAGTCCCCCTCTTGGTAGGCAT GGTCTC  
 CTTTTATATCTCAAGGGGATACCACATACACCATTTCTACCTACCCTTCTTTTGGGTGG GGACCC  
 ATCCTACTTTGACCAAAACTTGGCTTGACCTTCGTCTGACACCGGGATAACCCTGTCTCCCTC  
 ATTAATGGGCGGAGATTTGCAATGGCTGCCGTCCGAAT GGGCTCCGATGGGATGGGTCATACC  
 AACCTCCACTCCGCCGGAAGCA GGTGCAACGTGGAAG CACG GTTGTGTTGCTGATGACGCGACC  
 GCGTCAGACCAGTCACAGACCGGTATTCTTGTCAC CACG TGTGAGTTAGCATGCTA CACG  
 TCTGCCCTTCTTCATACAATGACTTCCTTGCAATGGTTGCGATGAAGCCTGGAATGTATCTAGCC  
 GGGGCTGACGTGCCAACTCCAGGAGTCCC CACG CCGGCTCCGGCTAGGGACGAGTGCCTGGAG  
 GCTCTCATCATTCCGACGGGACGGGGCGAGGCGTGTGTCA GGGCGCTGTTGCCCCCTAACCCG  
 CGATCTGACCGGTCTGTGACCGGTACACACTGCGACCGAT CACG GACTAGATAAGCATGTGCT  
 ACGCTGCATTAATGCGGCGTGAGACGCTCGTCCAACCCGCAATAAACGCGGTTAGGTGAGCG  
 CCGCTGTGCTCATCTAACCACAC CACG TGGCGCAAACCCTCAGGGGGTTCGGGGCGCCCCAGC  
 CCTCGGGGACGAAACGGGAGC GGGCGACCCCTCGGGGAGATAGAGGGAGGGGCGGCCTCAT  
 CACCCTC GGGCCCGACCCCCCGAGGGGGTCAGGC CACG TGGGTGACCGCGGCTGCCCAAAC  
 CTCTAGTCAAGATATCCCC GGTCCCATGTACCGACAATACTAATAAGATAAATCTTATCCGAC  
 ACG GAAAGAGATCCTCTTACCTACTTGTGTGTCAGTTGAATTACTGATATATAAACCAACAACAA  
 AGTAGGATTAATTCATATATCAGTGACAACCTACACAGTTAGGTCAAAGGATCCGCTTCCATCCG  
 GCACTAGGTTGGGAGTATTACCATACAAGCTTCCCTTGCTGCCTGCTGCTGGCCACTCCTTGTGT  
 CCACTGTCCACAGATACAACTCCATTCGTAATTTTCGTAC GGGCGTCGGGTACATCTAGTGC  
 AGG CACGAA CACGTACAGACTCCCCTGATTTTTGGATCTATTTAAGCCGAGCTGAGTGAACCAA  
 TTGGCCACC

**Figure S7: Cis-acting element analysis of *OsFRDL4* promoter.**

NAC TFs of cis-acting element: CACG.

ART1 TF of cis-acting element: [GGN(T/g/a/C)V(C/A/g)S(C/G)].
